# Supplementary material for: Exploratory genome-wide association analysis of response to ketamine and a polygenic analysis of response to scopolamine in depression
Source: PubMed Central journal article supplement (PMC6294748; doi:10.1038/s41398-018-0311-7), 2018-12-14

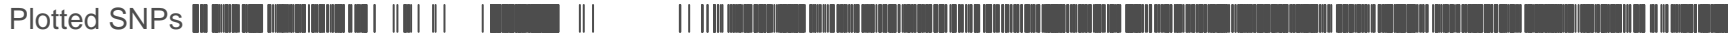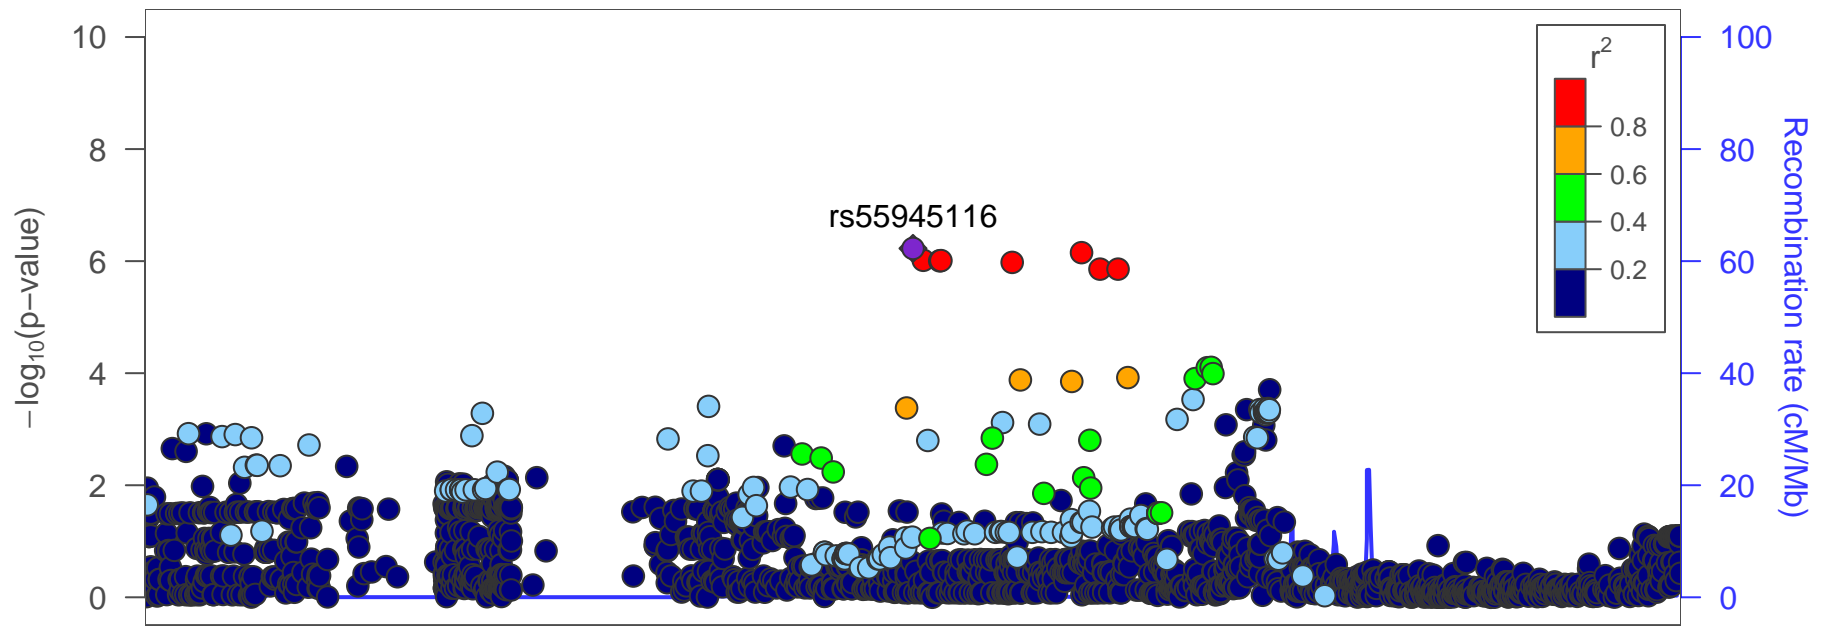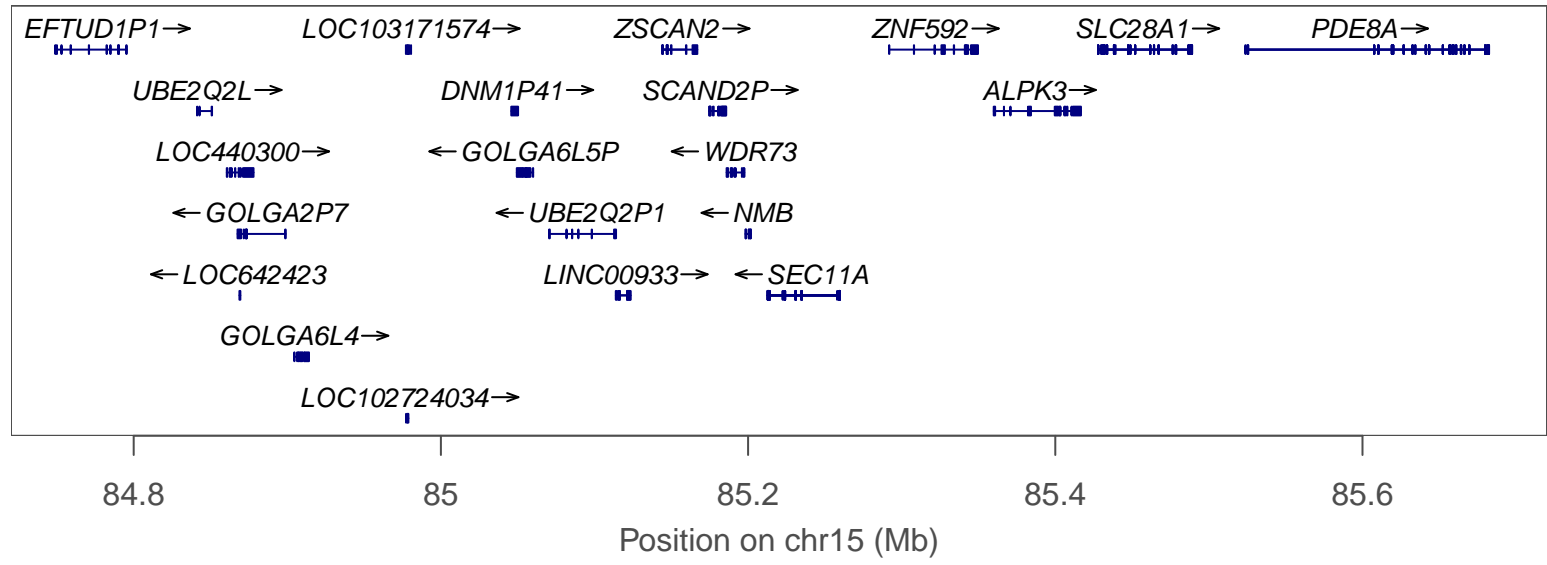

Supplement: 41398_2018_311_MOESM5_ESM.pdf [file 41398_2018_311_MOESM5_ESM.pdf]
